# Supplementary material for: Skin and fur bacterial diversity and community structure on American southwestern bats: effects of habitat, geography and bat traits
Source: PubMed Central journal article supplement (PMC5661439; doi:10.7717/peerj.3944), 2017-10-27
Supplement: peerj-05-3944-s002.pdf [file peerj-05-3944-s002.pdf]

**Supplemental table 2.** Most abundant phyla found on bats in the study separated by bat species. I is the most abundant phyla for that species, II the second most abundant phyla and III the third most abundant phyla based on relative abundance.

885

| <b>Bat species</b>     | <b>I</b>       | <b>II</b>           | <b>III</b>                      |
|------------------------|----------------|---------------------|---------------------------------|
| <i>A. pallidus</i>     | Actinobacteria | Alphaproteobacteria | Cyanobacteria                   |
| <i>C. townsendii</i>   | Actinobacteria | Alphaproteobacteria | Acidobacteria                   |
| <i>E. fuscus</i>       | Actinobacteria | Firmicutes          | Alphaproteobacteria             |
| <i>L. noctivagans</i>  | Actinobacteria | Alphaproteobacteria | Betaproteobacteria              |
| <i>M. californicus</i> | Actinobacteria | Alphaproteobacteria | Cyanobacteria/<br>Acidobacteria |
| <i>M. ciliolabrum</i>  | Actinobacteria | Alphaproteobacteria | Chloroflexi                     |
| <i>M. evotis</i>       | Actinobacteria | Alphaproteobacteria | Gammaproteobacteria             |
| <i>M. occultus</i>     | Actinobacteria | Alphaproteobacteria | Firmicutes                      |
| <i>M. thysanodes</i>   | Actinobacteria | Firmicutes          | Gammaproteobacteria             |
| <i>M. velifer</i>      | Actinobacteria | Gammaproteobacteria | Bacteroidetes                   |
| <i>M. volans</i>       | Actinobacteria | Gammaproteobacteria | Alphaproteobacteria             |
| <i>P. hesperus</i>     | Actinobacteria | Alphaproteobacteria | Cyanobacteria                   |
| <i>T. brasiliensis</i> | Firmicutes     | Actinobacteria      | Alphaproteobacteria             |
