# Supplementary material for: Skin and fur bacterial diversity and community structure on American southwestern bats: effects of habitat, geography and bat traits
Source: PeerJ. 2017 Oct 27;5:e3944. doi: 10.7717/peerj.3944 (PMC5661439; doi:10.7717/peerj.3944)
Supplement: Supplemental Information 6 — Bacteria richness model. [file peerj-05-3944-s006.xlsx]

## Sheet: Bacteria richness model
Bacteria richness model results
	mean	sd	0.025			0.25	0.5	0.75		50% uncertainity
(Intercept)	-1302.3	1478.6	-4198.4		(Intercept)	-2242.9	-1308.7	-375.4
lat	57.2	42.8	-28.3		lat	30.3	57.6	84.3		sampling site (local habitat)
b[(Intercept) sampling_site:Bat]	-213.7	114.1	-441.2		b[(Intercept) sampling_site:Bat]	-289.4	-212.7	-137		-262	298
b[(Intercept) sampling_site:Braided]	89.9	108	-118.2		b[(Intercept) sampling_site:Braided]	17.1	88.6	161.2
b[(Intercept) sampling_site:Cerrito_Comadre]	162.4	86.4	-8.5		b[(Intercept) sampling_site:Cerrito_Comadre]	106	162	218.3		Feeding flight
b[(Intercept) sampling_site:Cerro_Rendija]	80.3	98.6	-112.7		b[(Intercept) sampling_site:Cerro_Rendija]	15.4	79.4	145		-110	73
b[(Intercept) sampling_site:Classic]	-54.1	95.8	-242.4		b[(Intercept) sampling_site:Classic]	-117.9	-54.2	9.8
b[(Intercept) sampling_site:CRY]	-179.4	132.5	-433.2		b[(Intercept) sampling_site:CRY]	-269.3	-182.3	-92.8		bat species
b[(Intercept) sampling_site:Four_Windows]	71.2	113.8	-151		b[(Intercept) sampling_site:Four_Windows]	-4.7	70.1	146.4		-26	24.9
b[(Intercept) sampling_site:Ft_Stanton_Historic_Section]	134.4	108.1	-75		b[(Intercept) sampling_site:Ft_Stanton_Historic_Section]	62.3	133.5	206.2
b[(Intercept) sampling_site:Hell_Hole_2_]	209.9	108.3	2.2		b[(Intercept) sampling_site:Hell_Hole_2_]	136.7	208	281.8		ecoregion
b[(Intercept) sampling_site:Indian_Shelter_Pool]	-1.2	145	-291		b[(Intercept) sampling_site:Indian_Shelter_Pool]	-95.9	-0.5	94.2		-1.3	18.7
b[(Intercept) sampling_site:Junction]	44	101.7	-154.6		b[(Intercept) sampling_site:Junction]	-23.9	43.7	111.9
b[(Intercept) sampling_site:KyPet_Camp]	-2	125.1	-246.9		b[(Intercept) sampling_site:KyPet_Camp]	-83.8	-2.9	78.7		cave surface
b[(Intercept) sampling_site:Lefthand_Tunnel]	200.7	129.5	-62.3		b[(Intercept) sampling_site:Lefthand_Tunnel]	116.2	203.7	287.3		-2.7	2
b[(Intercept) sampling_site:Lowe_Last_Chance_Spring_]	114.1	112.1	-104.7		b[(Intercept) sampling_site:Lowe_Last_Chance_Spring_]	39.6	113.5	188.1
b[(Intercept) sampling_site:Rattle_Snake_Spring]	10.9	137.2	-258.8		b[(Intercept) sampling_site:Rattle_Snake_Spring]	-79.2	10.7	100.2		latitude
b[(Intercept) sampling_site:Rio_Bonito]	300.1	101.4	104.1		b[(Intercept) sampling_site:Rio_Bonito]	231.2	298.8	368		57
b[(Intercept) sampling_site:Rio_Bonito_Bridge]	-264.1	98.1	-459.4		b[(Intercept) sampling_site:Rio_Bonito_Bridge]	-329	-262.4	-198.2
b[(Intercept) sampling_site:Rio_Bonito_S._Bnkhse]	-180.5	102.4	-384.3		b[(Intercept) sampling_site:Rio_Bonito_S._Bnkhse]	-247.9	-179.4	-112.6
b[(Intercept) sampling_site:Squaw_Cnyn_Tank]	-32.1	130.9	-288.5		b[(Intercept) sampling_site:Squaw_Cnyn_Tank]	-117.9	-32.9	52.3
b[(Intercept) sampling_site:Tincannibits]	-45.7	107.6	-257.1		b[(Intercept) sampling_site:Tincannibits]	-116.8	-45.8	24.5
b[(Intercept) sampling_site:TOR]	-219.7	126.9	-449		b[(Intercept) sampling_site:TOR]	-307.6	-227.1	-138.6
b[(Intercept) sampling_site:Upper_Rio_Bonito]	-189.2	97.1	-382.4		b[(Intercept) sampling_site:Upper_Rio_Bonito]	-252.5	-188.7	-125.3
b[(Intercept) sampling_site:Waring_Pond]	-7.5	110.2	-222.9		b[(Intercept) sampling_site:Waring_Pond]	-80.8	-7.8	64.4
b[(Intercept) species:Antrozous_pallidus]	27.2	62.4	-72.5		b[(Intercept) species:Antrozous_pallidus]	-5.8	12.2	52.6
b[(Intercept) species:Corynorhinus_townsendii]	18.2	47.6	-66.8		b[(Intercept) species:Corynorhinus_townsendii]	-7.4	9.2	41.2
b[(Intercept) species:Eptesicus_fuscus]	25.3	43.5	-46.9		b[(Intercept) species:Eptesicus_fuscus]	-1.4	16.2	48.3
b[(Intercept) species:Lasionycteris_noctivagans]	-36.6	47.1	-148.1		b[(Intercept) species:Lasionycteris_noctivagans]	-63.3	-26.7	-2.2
b[(Intercept) species:Myotis_californicus]	-11.8	48.9	-125.5		b[(Intercept) species:Myotis_californicus]	-33.9	-4.7	12.6
b[(Intercept) species:Myotis_ciliolabrum]	39.5	55.2	-37.4		b[(Intercept) species:Myotis_ciliolabrum]	0.9	24.9	68
b[(Intercept) species:Myotis_evotis]	-7.9	49.1	-117.4		b[(Intercept) species:Myotis_evotis]	-30.5	-3.6	14.5
b[(Intercept) species:Myotis_occultus]	2.2	53.5	-112.8		b[(Intercept) species:Myotis_occultus]	-21.3	0.7	26.1
b[(Intercept) species:Myotis_thysanodes]	-20.7	46.4	-133.1		b[(Intercept) species:Myotis_thysanodes]	-43	-11	5.3
b[(Intercept) species:Myotis_velifer]	-18.6	53	-149.5		b[(Intercept) species:Myotis_velifer]	-41.6	-7.8	9.5
b[(Intercept) species:Myotis_volans]	-2.5	51.6	-119.8		b[(Intercept) species:Myotis_volans]	-24.2	-0.3	21.6
b[(Intercept) species:Parastrellus_hesperus]	-8	49.2	-121.7		b[(Intercept) species:Parastrellus_hesperus]	-29.9	-2.9	15.8
b[(Intercept) species:Tadarida_brasiliensis]	-3.3	50.4	-115.3		b[(Intercept) species:Tadarida_brasiliensis]	-25.3	-0.7	20.2
b[(Intercept) ecoregion_iv:Chihuahuan_Basins_and_Playas]	-89	119.1	-394.7		b[(Intercept) ecoregion_iv:Chihuahuan_Basins_and_Playas]	-147.2	-51.1	-3.1
b[(Intercept) ecoregion_iv:Chihuahuan_Desert_Grasslands]	3.2	96.8	-203.3		b[(Intercept) ecoregion_iv:Chihuahuan_Desert_Grasslands]	-35.3	0.7	40.9
b[(Intercept) ecoregion_iv:Chihuahuan_Desert_Slopes]	44.3	101.6	-119.9		b[(Intercept) ecoregion_iv:Chihuahuan_Desert_Slopes]	-7.7	18.7	85
b[(Intercept) ecoregion_iv:Conifer_Woodlands_and_Savannas]	2	73.9	-152.5		b[(Intercept) ecoregion_iv:Conifer_Woodlands_and_Savannas]	-31.3	0.4	34.3
b[(Intercept) ecoregion_iv:Eastern_Mojave_Basins]	-6.4	95.1	-219.1		b[(Intercept) ecoregion_iv:Eastern_Mojave_Basins]	-43.5	-1.3	31.6
b[(Intercept) ecoregion_iv:Eastern_Mojave_Low_Ranges_and_Arid_Footslopes]	2.3	92.8	-196.4		b[(Intercept) ecoregion_iv:Eastern_Mojave_Low_Ranges_and_Arid_Footslopes]	-35.3	0.1	39.1
b[(Intercept) ecoregion_iv:Lava_Malpais]	27.8	74.1	-106.8		b[(Intercept) ecoregion_iv:Lava_Malpais]	-9.7	13.7	62.5
b[(Intercept) ecoregion_iv:Shivwits_Woodland]	16	87.4	-153.7		b[(Intercept) ecoregion_iv:Shivwits_Woodland]	-22.9	4.5	50.9
b[(Intercept) Feeding.Flight.behavior:Aerial_hawking]	-126.4	120.8	-405.6		b[(Intercept) Feeding.Flight.behavior:Aerial_hawking]	-193.6	-110.3	-38.5
b[(Intercept) Feeding.Flight.behavior:Gleaner]	-80	130.9	-395.9		b[(Intercept) Feeding.Flight.behavior:Gleaner]	-147.8	-54	3.5
b[(Intercept) Feeding.Flight.behavior:Gleaner/Aerial_hawking/_Sit_&_Wait]	42	121.1	-197.3		b[(Intercept) Feeding.Flight.behavior:Gleaner/Aerial_hawking/_Sit_&_Wait]	-20.5	29.4	106.2
b[(Intercept) Feeding.Flight.behavior:Gleaner/Aerial_hawking/Sit_&_wait]	104.1	150.9	-131.4		b[(Intercept) Feeding.Flight.behavior:Gleaner/Aerial_hawking/Sit_&_wait]	2.6	73.2	183.7
b[(Intercept) Feeding.Flight.behavior:GleanerAerial_hawkingSit_&_Wait]	57.1	135.5	-195.2		b[(Intercept) Feeding.Flight.behavior:GleanerAerial_hawkingSit_&_Wait]	-15.7	37.8	126.5
b[(Intercept) cave_or_surface:Cave]	4.6	121.3	-255.2		b[(Intercept) cave_or_surface:Cave]	-27.4	2	41.9
b[(Intercept) cave_or_surface:Surface]	-12.8	119.8	-287.8		b[(Intercept) cave_or_surface:Surface]	-43.3	-2.7	25.5
sigma	197	11.8	175.3		sigma	188.8	196.5	204.6
Sigma[sampling_site:(Intercept),(Intercept)]	39050	16903.9	16027.7		Sigma[sampling_site:(Intercept),(Intercept)]	27332.4	35833.5	47096.8
Sigma[species:(Intercept),(Intercept)]	3757.4	5093.2	5.7		Sigma[species:(Intercept),(Intercept)]	549.4	2050	4988.2
Sigma[ecoregion_iv:(Intercept),(Intercept)]	13491.2	22901.6	7.6		Sigma[ecoregion_iv:(Intercept),(Intercept)]	1142.4	5498.9	16395.5
Sigma[Feeding.Flight.behavior:(Intercept),(Intercept)]	36796.9	60450.9	89.9		Sigma[Feeding.Flight.behavior:(Intercept),(Intercept)]	6171.6	18493.3	43411.2
Sigma[cave_or_surface:(Intercept),(Intercept)]	25772.6	64803.1	6.9		Sigma[cave_or_surface:(Intercept),(Intercept)]	875.3	4851.4	20627.9
mean_PPD	560.4	21.8	517.7		mean_PPD	545.7	560.4	575
log-posterior	-1195.3	7.1	-1210.1		log-posterior	-1199.9	-1195	-1190.3

## Sheet: Sheet2
MDS1											MDS2
	mean	sd	0.025	0.25			0.5	0.75	0.975			mean	sd	0.025	0.25			0.5	0.75	0.975
(Intercept)	4.6	5.6	-6.9	1.2		(Intercept)	4.7	8.2	15.5		(Intercept)	3.6	2.7	-1.9	1.9		(Intercept)	3.6	5.3	8.9
lat	-0.1	0.2	-0.5	-0.2		lat	-0.1	0	0.2		lat	-0.1	0.1	-0.3	-0.2		lat	-0.1	-0.1	0
b[(Intercept) sampling_site:Bat]	0.2	0.2	-0.2	0		b[(Intercept) sampling_site:Bat]	0.2	0.3	0.5		b[(Intercept) sampling_site:Bat]	0.3	0.2	-0.1	0.1		b[(Intercept) sampling_site:Bat]	0.3	0.4	0.7
b[(Intercept) sampling_site:Braided]	0	0.2	-0.4	-0.1		b[(Intercept) sampling_site:Braided]	0	0.1	0.4		b[(Intercept) sampling_site:Braided]	0.2	0.2	-0.1	0.1		b[(Intercept) sampling_site:Braided]	0.2	0.4	0.6
b[(Intercept) sampling_site:Cerrito_Comadre]	-0.2	0.2	-0.6	-0.3		b[(Intercept) sampling_site:Cerrito_Comadre]	-0.2	-0.1	0.1		b[(Intercept) sampling_site:Cerrito_Comadre]	-0.3	0.2	-0.6	-0.4		b[(Intercept) sampling_site:Cerrito_Comadre]	-0.3	-0.2	0.1
b[(Intercept) sampling_site:Cerro_Rendija]	0	0.2	-0.4	-0.1		b[(Intercept) sampling_site:Cerro_Rendija]	0	0.1	0.4		b[(Intercept) sampling_site:Cerro_Rendija]	-0.4	0.2	-0.8	-0.5		b[(Intercept) sampling_site:Cerro_Rendija]	-0.4	-0.3	0
b[(Intercept) sampling_site:Classic]	-0.2	0.2	-0.5	-0.3		b[(Intercept) sampling_site:Classic]	-0.2	-0.1	0.1		b[(Intercept) sampling_site:Classic]	-0.1	0.2	-0.5	-0.2		b[(Intercept) sampling_site:Classic]	-0.1	0	0.2
b[(Intercept) sampling_site:CRY]	0	0.3	-0.4	-0.1		b[(Intercept) sampling_site:CRY]	0	0.2	0.6		b[(Intercept) sampling_site:CRY]	0	0.2	-0.4	-0.1		b[(Intercept) sampling_site:CRY]	0	0.2	0.4
b[(Intercept) sampling_site:Four_Windows]	-0.1	0.2	-0.4	-0.2		b[(Intercept) sampling_site:Four_Windows]	-0.1	0.1	0.3		b[(Intercept) sampling_site:Four_Windows]	0	0.2	-0.4	-0.1		b[(Intercept) sampling_site:Four_Windows]	0	0.1	0.4
b[(Intercept) sampling_site:Ft_Stanton_Historic_Section]	-0.4	0.2	-0.8	-0.5		b[(Intercept) sampling_site:Ft_Stanton_Historic_Section]	-0.4	-0.2	0		b[(Intercept) sampling_site:Ft_Stanton_Historic_Section]	0	0.2	-0.4	-0.1		b[(Intercept) sampling_site:Ft_Stanton_Historic_Section]	0	0.1	0.4
b[(Intercept) sampling_site:Hell_Hole_2_]	0	0.2	-0.4	-0.1		b[(Intercept) sampling_site:Hell_Hole_2_]	0	0.1	0.4		b[(Intercept) sampling_site:Hell_Hole_2_]	-0.3	0.2	-0.7	-0.4		b[(Intercept) sampling_site:Hell_Hole_2_]	-0.3	-0.1	0.1
b[(Intercept) sampling_site:Indian_Shelter_Pool]	-0.3	0.3	-1	-0.5		b[(Intercept) sampling_site:Indian_Shelter_Pool]	-0.3	-0.1	0.2		b[(Intercept) sampling_site:Indian_Shelter_Pool]	-0.1	0.2	-0.6	-0.3		b[(Intercept) sampling_site:Indian_Shelter_Pool]	-0.1	0	0.4
b[(Intercept) sampling_site:Junction]	0.2	0.2	-0.1	0.1		b[(Intercept) sampling_site:Junction]	0.2	0.3	0.6		b[(Intercept) sampling_site:Junction]	-0.3	0.2	-0.7	-0.4		b[(Intercept) sampling_site:Junction]	-0.3	-0.2	0.1
b[(Intercept) sampling_site:KyPet_Camp]	-0.1	0.3	-0.7	-0.3		b[(Intercept) sampling_site:KyPet_Camp]	-0.1	0.1	0.5		b[(Intercept) sampling_site:KyPet_Camp]	0.1	0.2	-0.4	-0.1		b[(Intercept) sampling_site:KyPet_Camp]	0.1	0.2	0.5
b[(Intercept) sampling_site:Lefthand_Tunnel]	0.2	0.3	-0.4	0		b[(Intercept) sampling_site:Lefthand_Tunnel]	0.1	0.3	0.7		b[(Intercept) sampling_site:Lefthand_Tunnel]	-0.2	0.2	-0.6	-0.3		b[(Intercept) sampling_site:Lefthand_Tunnel]	-0.2	-0.1	0.2
b[(Intercept) sampling_site:Lowe_Last_Chance_Spring_]	0	0.2	-0.4	-0.1		b[(Intercept) sampling_site:Lowe_Last_Chance_Spring_]	0	0.2	0.4		b[(Intercept) sampling_site:Lowe_Last_Chance_Spring_]	-0.1	0.2	-0.5	-0.2		b[(Intercept) sampling_site:Lowe_Last_Chance_Spring_]	-0.1	0	0.3
b[(Intercept) sampling_site:Rattle_Snake_Spring]	0	0.3	-0.5	-0.2		b[(Intercept) sampling_site:Rattle_Snake_Spring]	0	0.2	0.6		b[(Intercept) sampling_site:Rattle_Snake_Spring]	0.3	0.3	-0.2	0.1		b[(Intercept) sampling_site:Rattle_Snake_Spring]	0.3	0.5	0.8
b[(Intercept) sampling_site:Rio_Bonito]	-0.3	0.2	-0.7	-0.4		b[(Intercept) sampling_site:Rio_Bonito]	-0.3	-0.2	0		b[(Intercept) sampling_site:Rio_Bonito]	-0.3	0.2	-0.7	-0.5		b[(Intercept) sampling_site:Rio_Bonito]	-0.3	-0.2	0
b[(Intercept) sampling_site:Rio_Bonito_Bridge]	0.3	0.2	-0.1	0.1		b[(Intercept) sampling_site:Rio_Bonito_Bridge]	0.2	0.4	0.6		b[(Intercept) sampling_site:Rio_Bonito_Bridge]	0.6	0.2	0.2	0.5		b[(Intercept) sampling_site:Rio_Bonito_Bridge]	0.6	0.7	0.9
b[(Intercept) sampling_site:Rio_Bonito_S._Bnkhse]	0.2	0.2	-0.2	0.1		b[(Intercept) sampling_site:Rio_Bonito_S._Bnkhse]	0.2	0.4	0.7		b[(Intercept) sampling_site:Rio_Bonito_S._Bnkhse]	0.3	0.2	-0.1	0.1		b[(Intercept) sampling_site:Rio_Bonito_S._Bnkhse]	0.3	0.4	0.6
b[(Intercept) sampling_site:Squaw_Cnyn_Tank]	0	0.3	-0.5	-0.1		b[(Intercept) sampling_site:Squaw_Cnyn_Tank]	0	0.2	0.6		b[(Intercept) sampling_site:Squaw_Cnyn_Tank]	0.1	0.2	-0.4	-0.1		b[(Intercept) sampling_site:Squaw_Cnyn_Tank]	0.1	0.2	0.5
b[(Intercept) sampling_site:Tincannibits]	-0.1	0.2	-0.5	-0.2		b[(Intercept) sampling_site:Tincannibits]	-0.1	0	0.3		b[(Intercept) sampling_site:Tincannibits]	0.2	0.2	-0.2	0.1		b[(Intercept) sampling_site:Tincannibits]	0.2	0.3	0.6
b[(Intercept) sampling_site:TOR]	0.3	0.3	-0.2	0.1		b[(Intercept) sampling_site:TOR]	0.3	0.5	0.9		b[(Intercept) sampling_site:TOR]	0.2	0.2	-0.2	0		b[(Intercept) sampling_site:TOR]	0.2	0.3	0.6
b[(Intercept) sampling_site:Upper_Rio_Bonito]	0.2	0.2	-0.1	0.1		b[(Intercept) sampling_site:Upper_Rio_Bonito]	0.2	0.3	0.6		b[(Intercept) sampling_site:Upper_Rio_Bonito]	-0.1	0.2	-0.4	-0.2		b[(Intercept) sampling_site:Upper_Rio_Bonito]	-0.1	0	0.3
b[(Intercept) sampling_site:Waring_Pond]	0	0.2	-0.4	-0.1		b[(Intercept) sampling_site:Waring_Pond]	0	0.2	0.5		b[(Intercept) sampling_site:Waring_Pond]	0.1	0.2	-0.3	-0.1		b[(Intercept) sampling_site:Waring_Pond]	0.1	0.2	0.5
b[(Intercept) species:Antrozous_pallidus]	-0.2	0.3	-0.8	-0.4		b[(Intercept) species:Antrozous_pallidus]	-0.2	0	0.2		b[(Intercept) species:Antrozous_pallidus]	0	0.1	-0.4	-0.1		b[(Intercept) species:Antrozous_pallidus]	0	0	0.2
b[(Intercept) species:Corynorhinus_townsendii]	-0.1	0.2	-0.5	-0.2		b[(Intercept) species:Corynorhinus_townsendii]	-0.1	0	0.3		b[(Intercept) species:Corynorhinus_townsendii]	0	0.1	-0.2	-0.1		b[(Intercept) species:Corynorhinus_townsendii]	0	0.1	0.3
b[(Intercept) species:Eptesicus_fuscus]	-0.1	0.2	-0.4	-0.2		b[(Intercept) species:Eptesicus_fuscus]	-0.1	0	0.2		b[(Intercept) species:Eptesicus_fuscus]	0	0.1	-0.2	0		b[(Intercept) species:Eptesicus_fuscus]	0	0.1	0.2
b[(Intercept) species:Lasionycteris_noctivagans]	-0.1	0.2	-0.4	-0.2		b[(Intercept) species:Lasionycteris_noctivagans]	-0.1	0	0.2		b[(Intercept) species:Lasionycteris_noctivagans]	0.1	0.1	-0.1	0		b[(Intercept) species:Lasionycteris_noctivagans]	0.1	0.1	0.3
b[(Intercept) species:Myotis_californicus]	-0.1	0.2	-0.5	-0.2		b[(Intercept) species:Myotis_californicus]	-0.1	0	0.3		b[(Intercept) species:Myotis_californicus]	0	0.1	-0.3	-0.1		b[(Intercept) species:Myotis_californicus]	0	0	0.2
b[(Intercept) species:Myotis_ciliolabrum]	-0.3	0.2	-0.7	-0.5		b[(Intercept) species:Myotis_ciliolabrum]	-0.3	-0.2	0		b[(Intercept) species:Myotis_ciliolabrum]	-0.1	0.1	-0.4	-0.2		b[(Intercept) species:Myotis_ciliolabrum]	-0.1	0	0.1
b[(Intercept) species:Myotis_evotis]	0.1	0.2	-0.3	-0.1		b[(Intercept) species:Myotis_evotis]	0.1	0.2	0.5		b[(Intercept) species:Myotis_evotis]	-0.2	0.2	-0.5	-0.2		b[(Intercept) species:Myotis_evotis]	-0.1	0	0.1
b[(Intercept) species:Myotis_occultus]	-0.2	0.2	-0.6	-0.3		b[(Intercept) species:Myotis_occultus]	-0.2	0	0.3		b[(Intercept) species:Myotis_occultus]	-0.1	0.2	-0.5	-0.2		b[(Intercept) species:Myotis_occultus]	-0.1	0	0.2
b[(Intercept) species:Myotis_thysanodes]	0.3	0.2	-0.1	0.1		b[(Intercept) species:Myotis_thysanodes]	0.2	0.4	0.6		b[(Intercept) species:Myotis_thysanodes]	0.1	0.1	-0.1	0		b[(Intercept) species:Myotis_thysanodes]	0.1	0.2	0.4
b[(Intercept) species:Myotis_velifer]	0.7	0.3	0.1	0.5		b[(Intercept) species:Myotis_velifer]	0.7	0.9	1.3		b[(Intercept) species:Myotis_velifer]	0.2	0.2	-0.1	0.1		b[(Intercept) species:Myotis_velifer]	0.2	0.3	0.6
b[(Intercept) species:Myotis_volans]	0.2	0.2	-0.2	0.1		b[(Intercept) species:Myotis_volans]	0.2	0.4	0.7		b[(Intercept) species:Myotis_volans]	-0.1	0.2	-0.5	-0.2		b[(Intercept) species:Myotis_volans]	-0.1	0	0.1
b[(Intercept) species:Parastrellus_hesperus]	-0.2	0.2	-0.7	-0.4		b[(Intercept) species:Parastrellus_hesperus]	-0.2	-0.1	0.1		b[(Intercept) species:Parastrellus_hesperus]	0	0.1	-0.2	0		b[(Intercept) species:Parastrellus_hesperus]	0	0.1	0.3
b[(Intercept) species:Tadarida_brasiliensis]	0.1	0.2	-0.3	0		b[(Intercept) species:Tadarida_brasiliensis]	0.1	0.3	0.6		b[(Intercept) species:Tadarida_brasiliensis]	0.2	0.2	-0.1	0		b[(Intercept) species:Tadarida_brasiliensis]	0.2	0.3	0.6
b[(Intercept) ecoregion_iv:Chihuahuan_Basins_and_Playas]	1.4	0.5	0.5	1		b[(Intercept) ecoregion_iv:Chihuahuan_Basins_and_Playas]	1.3	1.6	2.3		b[(Intercept) ecoregion_iv:Chihuahuan_Basins_and_Playas]	0	0.2	-0.3	0		b[(Intercept) ecoregion_iv:Chihuahuan_Basins_and_Playas]	0	0.1	0.4
b[(Intercept) ecoregion_iv:Chihuahuan_Desert_Grasslands]	0.1	0.5	-0.9	-0.2		b[(Intercept) ecoregion_iv:Chihuahuan_Desert_Grasslands]	0.1	0.4	1.1		b[(Intercept) ecoregion_iv:Chihuahuan_Desert_Grasslands]	0.1	0.2	-0.2	0		b[(Intercept) ecoregion_iv:Chihuahuan_Desert_Grasslands]	0	0.2	0.6
b[(Intercept) ecoregion_iv:Chihuahuan_Desert_Slopes]	-0.6	0.5	-1.5	-0.9		b[(Intercept) ecoregion_iv:Chihuahuan_Desert_Slopes]	-0.6	-0.3	0.4		b[(Intercept) ecoregion_iv:Chihuahuan_Desert_Slopes]	-0.1	0.2	-0.6	-0.2		b[(Intercept) ecoregion_iv:Chihuahuan_Desert_Slopes]	0	0	0.2
b[(Intercept) ecoregion_iv:Conifer_Woodlands_and_Savannas]	0	0.3	-0.7	-0.2		b[(Intercept) ecoregion_iv:Conifer_Woodlands_and_Savannas]	0	0.2	0.7		b[(Intercept) ecoregion_iv:Conifer_Woodlands_and_Savannas]	0	0.1	-0.3	0		b[(Intercept) ecoregion_iv:Conifer_Woodlands_and_Savannas]	0	0.1	0.3
b[(Intercept) ecoregion_iv:Eastern_Mojave_Basins]	0.1	0.5	-0.9	-0.2		b[(Intercept) ecoregion_iv:Eastern_Mojave_Basins]	0.1	0.4	1		b[(Intercept) ecoregion_iv:Eastern_Mojave_Basins]	0	0.2	-0.3	-0.1		b[(Intercept) ecoregion_iv:Eastern_Mojave_Basins]	0	0.1	0.4
b[(Intercept) ecoregion_iv:Eastern_Mojave_Low_Ranges_and_Arid_Footslopes]	-0.4	0.5	-1.4	-0.7		b[(Intercept) ecoregion_iv:Eastern_Mojave_Low_Ranges_and_Arid_Footslopes]	-0.4	-0.1	0.4		b[(Intercept) ecoregion_iv:Eastern_Mojave_Low_Ranges_and_Arid_Footslopes]	0	0.2	-0.3	-0.1		b[(Intercept) ecoregion_iv:Eastern_Mojave_Low_Ranges_and_Arid_Footslopes]	0	0.1	0.4
b[(Intercept) ecoregion_iv:Lava_Malpais]	-0.3	0.3	-1	-0.5		b[(Intercept) ecoregion_iv:Lava_Malpais]	-0.3	-0.1	0.3		b[(Intercept) ecoregion_iv:Lava_Malpais]	-0.1	0.2	-0.5	-0.2		b[(Intercept) ecoregion_iv:Lava_Malpais]	-0.1	0	0.1
b[(Intercept) ecoregion_iv:Shivwits_Woodland]	-0.2	0.4	-1.1	-0.4		b[(Intercept) ecoregion_iv:Shivwits_Woodland]	-0.2	0.1	0.6		b[(Intercept) ecoregion_iv:Shivwits_Woodland]	0	0.2	-0.3	0		b[(Intercept) ecoregion_iv:Shivwits_Woodland]	0	0.1	0.4
b[(Intercept) Feeding.Flight.behavior:Aerial_hawking]	0.1	0.2	-0.3	0		b[(Intercept) Feeding.Flight.behavior:Aerial_hawking]	0.1	0.2	0.6		b[(Intercept) Feeding.Flight.behavior:Aerial_hawking]	0	0.1	-0.2	0		b[(Intercept) Feeding.Flight.behavior:Aerial_hawking]	0	0.1	0.3
b[(Intercept) Feeding.Flight.behavior:Gleaner]	-0.3	0.3	-1	-0.4		b[(Intercept) Feeding.Flight.behavior:Gleaner]	-0.2	-0.1	0.1		b[(Intercept) Feeding.Flight.behavior:Gleaner]	0	0.1	-0.2	0		b[(Intercept) Feeding.Flight.behavior:Gleaner]	0	0.1	0.3
b[(Intercept) Feeding.Flight.behavior:Gleaner/Aerial_hawking/_Sit_&_Wait]	0	0.2	-0.4	-0.1		b[(Intercept) Feeding.Flight.behavior:Gleaner/Aerial_hawking/_Sit_&_Wait]	0	0.1	0.6		b[(Intercept) Feeding.Flight.behavior:Gleaner/Aerial_hawking/_Sit_&_Wait]	0	0.1	-0.2	0		b[(Intercept) Feeding.Flight.behavior:Gleaner/Aerial_hawking/_Sit_&_Wait]	0	0.1	0.3
b[(Intercept) Feeding.Flight.behavior:Gleaner/Aerial_hawking/Sit_&_wait]	0.1	0.3	-0.3	0		b[(Intercept) Feeding.Flight.behavior:Gleaner/Aerial_hawking/Sit_&_wait]	0.1	0.3	0.8		b[(Intercept) Feeding.Flight.behavior:Gleaner/Aerial_hawking/Sit_&_wait]	0	0.1	-0.4	-0.1		b[(Intercept) Feeding.Flight.behavior:Gleaner/Aerial_hawking/Sit_&_wait]	0	0	0.2
b[(Intercept) Feeding.Flight.behavior:GleanerAerial_hawkingSit_&_Wait]	0	0.2	-0.5	-0.1		b[(Intercept) Feeding.Flight.behavior:GleanerAerial_hawkingSit_&_Wait]	0	0.1	0.5		b[(Intercept) Feeding.Flight.behavior:GleanerAerial_hawkingSit_&_Wait]	0	0.1	-0.4	-0.1		b[(Intercept) Feeding.Flight.behavior:GleanerAerial_hawkingSit_&_Wait]	0	0	0.2
b[(Intercept) cave_or_surface:Cave]	0.1	0.2	-0.4	0		b[(Intercept) cave_or_surface:Cave]	0	0.2	0.6		b[(Intercept) cave_or_surface:Cave]	-0.6	0.6	-1.7	-0.9		b[(Intercept) cave_or_surface:Cave]	-0.6	-0.3	0.6
b[(Intercept) cave_or_surface:Surface]	-0.1	0.2	-0.7	-0.2		b[(Intercept) cave_or_surface:Surface]	0	0	0.4		b[(Intercept) cave_or_surface:Surface]	0.6	0.6	-0.5	0.3		b[(Intercept) cave_or_surface:Surface]	0.6	0.9	1.7
sigma	0.4	0	0.3	0.3		sigma	0.4	0.4	0.4		sigma	0.3	0	0.3	0.3		sigma	0.3	0.4	0.4
Sigma[sampling_site:(Intercept),(Intercept)]	0.1	0.1	0	0.1		Sigma[sampling_site:(Intercept),(Intercept)]	0.1	0.1	0.2		Sigma[sampling_site:(Intercept),(Intercept)]	0.1	0	0	0.1		Sigma[sampling_site:(Intercept),(Intercept)]	0.1	0.1	0.2
Sigma[species:(Intercept),(Intercept)]	0.1	0.1	0	0.1		Sigma[species:(Intercept),(Intercept)]	0.1	0.2	0.4		Sigma[species:(Intercept),(Intercept)]	0	0	0	0		Sigma[species:(Intercept),(Intercept)]	0	0.1	0.2
Sigma[ecoregion_iv:(Intercept),(Intercept)]	0.5	0.4	0.1	0.3		Sigma[ecoregion_iv:(Intercept),(Intercept)]	0.4	0.7	1.6		Sigma[ecoregion_iv:(Intercept),(Intercept)]	0	0.1	0	0		Sigma[ecoregion_iv:(Intercept),(Intercept)]	0	0.1	0.2
Sigma[Feeding.Flight.behavior:(Intercept),(Intercept)]	0.1	0.2	0	0		Sigma[Feeding.Flight.behavior:(Intercept),(Intercept)]	0.1	0.1	0.6		Sigma[Feeding.Flight.behavior:(Intercept),(Intercept)]	0	0.1	0	0		Sigma[Feeding.Flight.behavior:(Intercept),(Intercept)]	0	0	0.2
Sigma[cave_or_surface:(Intercept),(Intercept)]	0.1	0.3	0	0		Sigma[cave_or_surface:(Intercept),(Intercept)]	0	0.1	0.8		Sigma[cave_or_surface:(Intercept),(Intercept)]	0.6	0.7	0.1	0.2		Sigma[cave_or_surface:(Intercept),(Intercept)]	0.4	0.7	2.4
mean_PPD	0	0	-0.1	0		mean_PPD	0	0	0.1		mean_PPD	0	0	-0.1	0		mean_PPD	0	0	0.1
log-posterior -1	54.7	7.4 -1	70.3 -1	59.5		log-posterior -1	54.3 -1	49.5 -1	41.3		log-posterior -1	50.7	7.3 -1	66.0 -1	55.5		log-posterior -1	50.4 -1	45.6 -1	37.3
